# Supplementary material for: Duchenne muscular dystrophy trajectory in R-DMDdel52 preclinical rat model identifies COMP as biomarker of fibrosis
Source: PubMed Central journal article supplement (PMC9036715; doi:10.1186/s40478-022-01355-2), 2022-04-25
Supplement: 40478_2022_1355_MOESM1_ESM.pdf [file 40478_2022_1355_MOESM1_ESM.pdf]

**R-DMDdel52 rat model of Duchenne muscular dystrophy for the identification of Comp as biomarker of fibrosis**

Valentina Taglietti<sup>1,2,3,6</sup>, Kaouthar Kefi<sup>1,2,3</sup>, Iwona Bronisz-Budzynka<sup>1,2,3</sup>, Busra Mirciloglu<sup>1,2,3</sup>, Mathilde Rodrigues<sup>1,2,3</sup>, Nastasia Cardone<sup>1,2,3</sup>, Fanny Couplier<sup>1,2,3</sup>, Baptiste Periou<sup>1,2,3,4</sup>, Christel Gentil<sup>5</sup>, Melissa Goddard<sup>1</sup>, François-Jérôme Authier<sup>1,2,3,4</sup>, France Pietri-Rouxel<sup>5</sup>, Edoardo Malfatti<sup>1,2,3,4</sup>, Peggy Lafuste<sup>1</sup>, Laurent Tiret<sup>1,2,3,6</sup>, Frederic Relaix<sup>1,2,3,4,6</sup> \*

1. Univ Paris-Est Créteil, INSERM, U955 IMRB, "Biology of the neuromuscular system" Team, F-94010 Créteil, France
2. Ecole nationale vétérinaire d'Alfort, IMRB, F-94700 Maisons-Alfort, France
3. EFS, IMRB, F-94010 Créteil, France
4. AP-HP, Hôpital Mondor, FHU SENEK, Service de Pathologie, F-94010 Créteil, France
5. Sorbonne Université, INSERM, UMRS974, Center for Research in Myology, F-75013, Paris, France
6. Senior authors

\*Correspondence to Frederic Relaix - frederic.relaix@inserm.fr - +33 149 813 940

## **Supplementary information**

### **Figures S1, S2 and S3.**

Figure S1

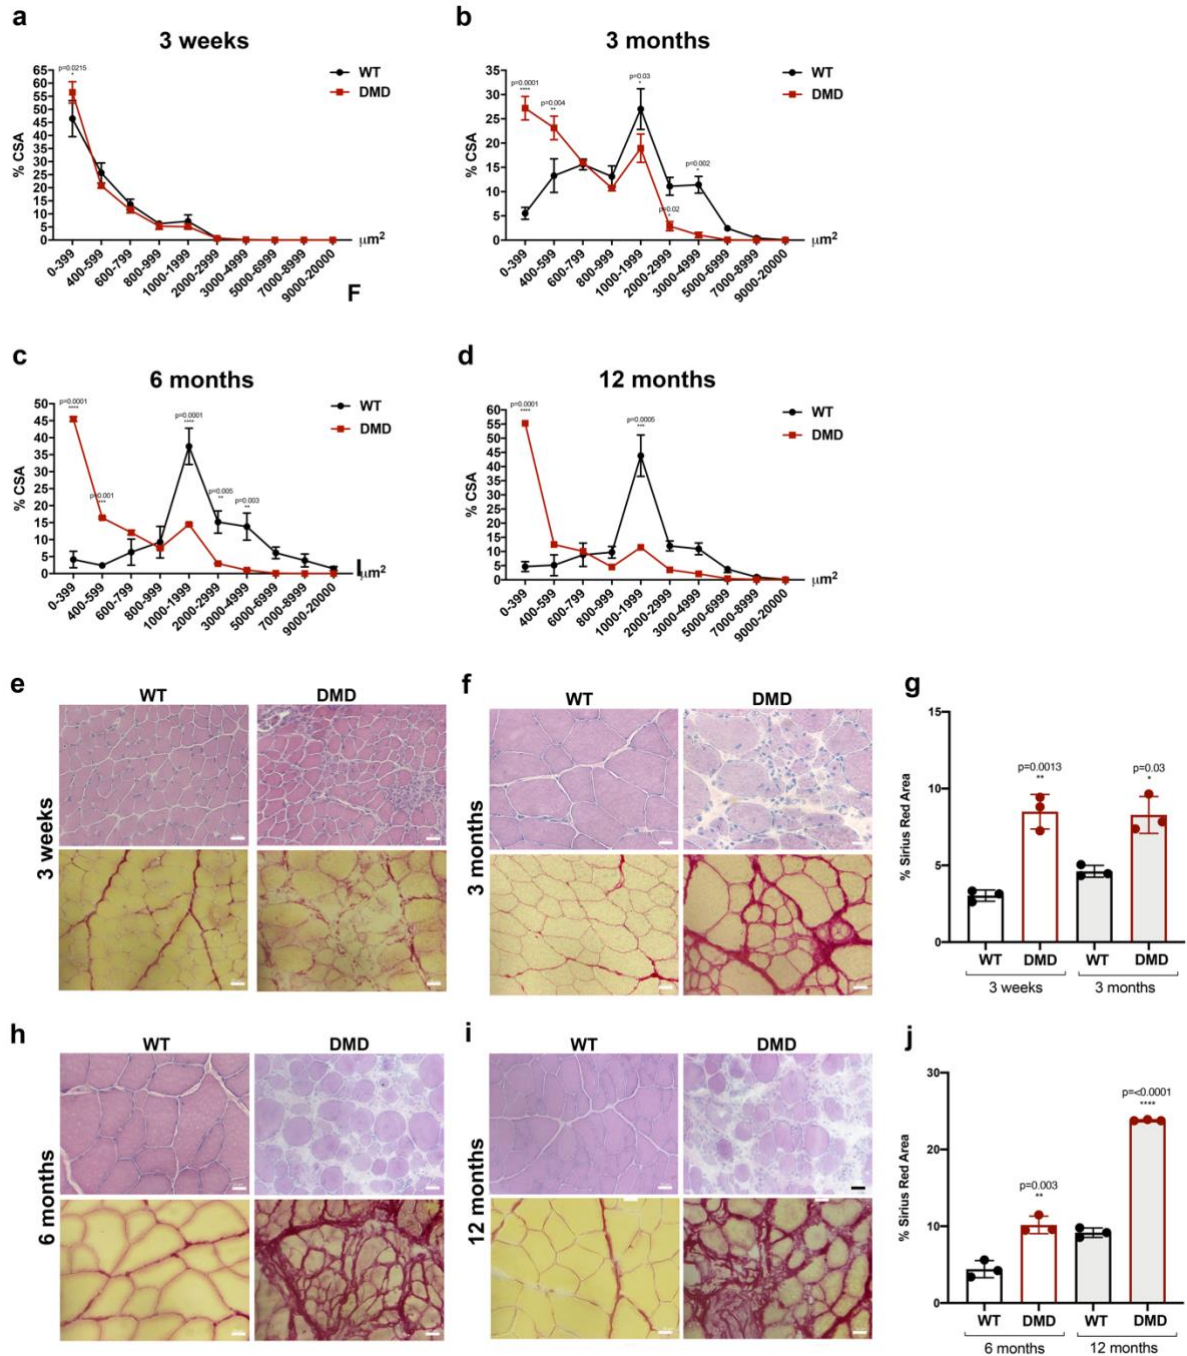

**Fig.S1** Myofibre CSA of the diaphragm and morphological evaluation of TA muscle

a) to d) CSA of diaphragm of WT and R-DMDdel52 rats at 3 weeks (a), 3 months (b), 6 months (c) and 12 months of age (d). e) Hematoxylin and eosin (upper panel) and Sirius red (lower panel) staining of *tibialis anterior* of 3-week-old WT and R-DMDdel52 rats (scale bar = 50 µm). f) Hematoxylin and eosin (upper panel) and Sirius red (lower panel) staining of *tibialis anterior* of 3-month-old WT and R-DMDdel52 rats (scale bar = 50 µm). g) Quantification of fibrotic Area of E-F. g) Quantification of fibrotic Area of e-f. h) Hematoxylin and eosin (upper panel) and Sirius red (lower panel) staining of *tibialis anterior* of 6-month-old WT and R-DMDdel52 rats (scale bar = 50 µm). i) Hematoxylin and eosin (upper panel) and Sirius red (lower panel) staining of *tibialis anterior* of 12-month-old WT and R-DMDdel52 rats (scale bar = 50 µm). j) Quantification of fibrotic Area of h-i.

Figure S2

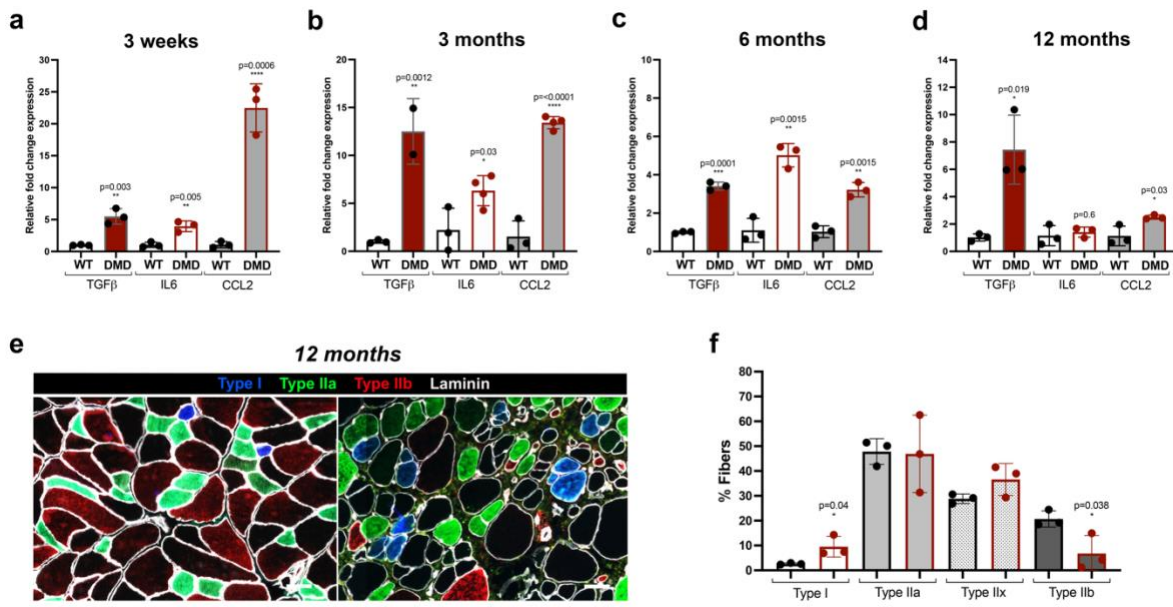

**Fig. S2** | Inflammatory cytokine evaluation and fibre type switching in R-DMDdel52 rats.

a-d) qPCR analysis of inflammatory cytokines (*TGFβ*, *IL6*, and *CCL2*) on quadriceps of WT and R-DMDdel52 rats at 3 weeks (a), 3 months (b), 6 months (c) and 12 months (d). e) Immunofluorescence for Type I (blue), IIa (green), IIx (unstained, black), IIb fibres (red) in WT and R-DMDdel52 EDL at 12 months (scale bar = 50 μm). (f) Quantifications of the percentage of Type I, IIa, IIx, IIb fibres at 12 months of age in WT and R-DMDdel52 EDL muscles. Statistical analysis was performed with unpaired Student's t-test.

Figure S3

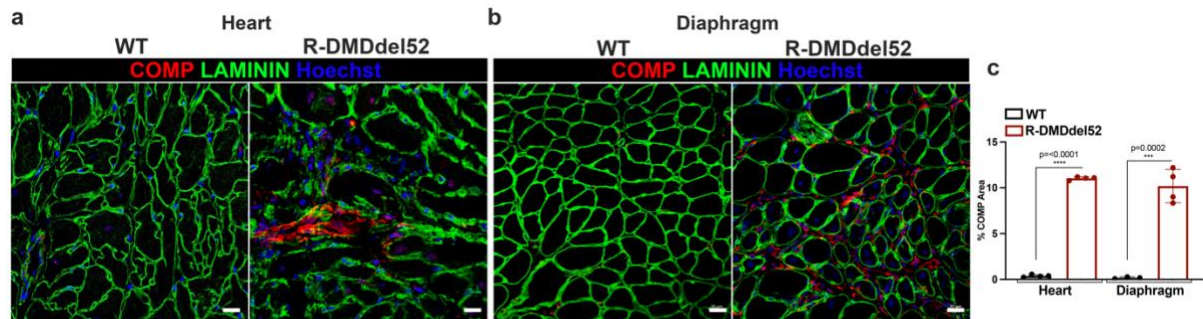

**Fig. S3** | COMP expression in heart and diaphragm.

a) and b) Representative immunofluorescences of COMP expression in heart (a) and diaphragm (b) of WT and R-DMDdel52 rat at the age of 12 months. LAMININ is shown in green, and nuclei are stained with Hoechst (scale bar = 50  $\mu$ m). c) Quantification of COMP positive area in heart and diaphragm at 12 months.
